# Supplementary material for: Association of Search Query Interest in Gastrointestinal Symptoms With COVID-19 Diagnosis in the United States: Infodemiology Study
Source: PubMed Central journal article supplement (PMC7371406; doi:10.2196/19354), 2020-07-17
Supplement: publichealth_v6i3e19354_app1.pdf [file publichealth_v6i3e19354_app1.pdf]

paperanalysis

| date      | fever | cough | diarrhea | vomiting | abdopain | constipation | nausea | cumcases | postmarch | newcases |
|-----------|-------|-------|----------|----------|----------|--------------|--------|----------|-----------|----------|
| 01oct2019 | 28    | 22    | 58       | 17       | 14       | 29           | 31     |          | 0         | 0        |
| 02oct2019 | 29    | 22    | 56       | 17       | 14       | 30           | 29     |          | 0         | 0        |
| 03oct2019 | 27    | 21    | 56       | 16       | 13       | 28           | 33     |          | 0         | 0        |
| 04oct2019 | 26    | 20    | 54       | 14       | 13       | 29           | 31     |          | 0         | 0        |
| 05oct2019 | 26    | 23    | 57       | 16       | 12       | 31           | 31     |          | 0         | 0        |
| 06oct2019 | 26    | 23    | 59       | 17       | 12       | 31           | 32     |          | 0         | 0        |
| 07oct2019 | 29    | 23    | 57       | 16       | 15       | 28           | 34     |          | 0         | 0        |
| 08oct2019 | 29    | 22    | 58       | 17       | 15       | 30           | 31     |          | 0         | 0        |
| 09oct2019 | 28    | 22    | 58       | 16       | 14       | 30           | 32     |          | 0         | 0        |
| 10oct2019 | 26    | 23    | 52       | 15       | 13       | 28           | 32     |          | 0         | 0        |
| 11oct2019 | 26    | 22    | 54       | 14       | 13       | 27           | 28     |          | 0         | 0        |
| 12oct2019 | 28    | 22    | 61       | 18       | 13       | 31           | 30     |          | 0         | 0        |
| 13oct2019 | 28    | 25    | 60       | 18       | 12       | 33           | 32     |          | 0         | 0        |
| 14oct2019 | 29    | 23    | 56       | 17       | 14       | 31           | 34     |          | 0         | 0        |
| 15oct2019 | 30    | 25    | 60       | 16       | 15       | 29           | 34     |          | 0         | 0        |
| 16oct2019 | 31    | 23    | 54       | 17       | 14       | 29           | 32     |          | 0         | 0        |
| 17oct2019 | 29    | 24    | 55       | 17       | 14       | 30           | 30     |          | 0         | 0        |
| 18oct2019 | 28    | 24    | 54       | 16       | 14       | 29           | 27     |          | 0         | 0        |
| 19oct2019 | 26    | 23    | 62       | 18       | 12       | 31           | 33     |          | 0         | 0        |
| 20oct2019 | 28    | 24    | 63       | 20       | 14       | 32           | 33     |          | 0         | 0        |
| 21oct2019 | 30    | 27    | 56       | 19       | 12       | 31           | 34     |          | 0         | 0        |
| 22oct2019 | 30    | 26    | 55       | 16       | 14       | 30           | 34     |          | 0         | 0        |
| 23oct2019 | 29    | 24    | 55       | 14       | 15       | 29           | 30     |          | 0         | 0        |
| 24oct2019 | 28    | 23    | 56       | 18       | 12       | 32           | 29     |          | 0         | 0        |
| 25oct2019 | 27    | 23    | 53       | 17       | 12       | 30           | 30     |          | 0         | 0        |
| 26oct2019 | 27    | 25    | 55       | 18       | 13       | 30           | 32     |          | 0         | 0        |
| 27oct2019 | 28    | 25    | 60       | 18       | 12       | 34           | 33     |          | 0         | 0        |
| 28oct2019 | 28    | 25    | 59       | 19       | 14       | 30           | 32     |          | 0         | 0        |
| 29oct2019 | 28    | 27    | 56       | 19       | 15       | 29           | 34     |          | 0         | 0        |
| 30oct2019 | 27    | 26    | 52       | 15       | 15       | 28           | 35     |          | 0         | 0        |
| 31oct2019 | 26    | 23    | 50       | 16       | 12       | 28           | 31     |          | 0         | 0        |
| 01nov2019 | 25    | 23    | 52       | 15       | 11       | 26           | 31     |          | 0         | 0        |
| 02nov2019 | 28    | 27    | 52       | 19       | 12       | 33           | 31     |          | 0         | 0        |
| 03nov2019 | 28    | 28    | 60       | 18       | 11       | 32           | 31     |          | 0         | 0        |
| 04nov2019 | 32    | 28    | 58       | 21       | 15       | 30           | 33     |          | 0         | 0        |
| 05nov2019 | 31    | 28    | 57       | 18       | 14       | 28           | 34     |          | 0         | 0        |
| 06nov2019 | 32    | 29    | 54       | 19       | 13       | 29           | 33     |          | 0         | 0        |

|           |    |    |    |    |    |    |    |  |   |   |
|-----------|----|----|----|----|----|----|----|--|---|---|
| 07nov2019 | 31 | 29 | 54 | 18 | 15 | 29 | 29 |  | 0 | 0 |
| 08nov2019 | 28 | 28 | 53 | 16 | 13 | 31 | 29 |  | 0 | 0 |
| 09nov2019 | 31 | 30 | 60 | 20 | 13 | 31 | 32 |  | 0 | 0 |
| 10nov2019 | 31 | 31 | 61 | 20 | 13 | 32 | 34 |  | 0 | 0 |
| 11nov2019 | 30 | 31 | 59 | 19 | 16 | 29 | 34 |  | 0 | 0 |
| 12nov2019 | 30 | 29 | 59 | 18 | 15 | 30 | 32 |  | 0 | 0 |
| 13nov2019 | 32 | 30 | 66 | 19 | 14 | 29 | 29 |  | 0 | 0 |
| 14nov2019 | 30 | 29 | 59 | 17 | 14 | 32 | 31 |  | 0 | 0 |
| 15nov2019 | 29 | 29 | 58 | 17 | 13 | 27 | 29 |  | 0 | 0 |
| 16nov2019 | 30 | 32 | 61 | 20 | 12 | 31 | 30 |  | 0 | 0 |
| 17nov2019 | 31 | 30 | 63 | 22 | 12 | 33 | 31 |  | 0 | 0 |
| 18nov2019 | 33 | 32 | 59 | 19 | 14 | 32 | 35 |  | 0 | 0 |
| 19nov2019 | 34 | 31 | 58 | 20 | 13 | 29 | 36 |  | 0 | 0 |
| 20nov2019 | 32 | 31 | 59 | 19 | 14 | 29 | 33 |  | 0 | 0 |
| 21nov2019 | 33 | 31 | 58 | 19 | 14 | 30 | 32 |  | 0 | 0 |
| 22nov2019 | 31 | 29 | 57 | 17 | 12 | 29 | 33 |  | 0 | 0 |
| 23nov2019 | 31 | 31 | 58 | 21 | 12 | 32 | 34 |  | 0 | 0 |
| 24nov2019 | 33 | 33 | 61 | 19 | 11 | 35 | 34 |  | 0 | 0 |
| 25nov2019 | 33 | 34 | 60 | 20 | 13 | 35 | 36 |  | 0 | 0 |
| 26nov2019 | 33 | 32 | 63 | 20 | 14 | 30 | 35 |  | 0 | 0 |
| 27nov2019 | 31 | 32 | 57 | 19 | 16 | 30 | 35 |  | 0 | 0 |
| 28nov2019 | 27 | 28 | 54 | 18 | 12 | 25 | 28 |  | 0 | 0 |
| 29nov2019 | 27 | 29 | 51 | 20 | 11 | 29 | 28 |  | 0 | 0 |
| 30nov2019 | 30 | 33 | 56 | 20 | 11 | 34 | 33 |  | 0 | 0 |
| 01dec2019 | 31 | 31 | 65 | 19 | 11 | 32 | 31 |  | 0 | 0 |
| 02dec2019 | 30 | 29 | 60 | 21 | 16 | 25 | 33 |  | 0 | 0 |
| 03dec2019 | 32 | 32 | 62 | 18 | 15 | 26 | 34 |  | 0 | 0 |
| 04dec2019 | 34 | 31 | 59 | 20 | 14 | 32 | 34 |  | 0 | 0 |
| 05dec2019 | 32 | 32 | 53 | 18 | 12 | 30 | 33 |  | 0 | 0 |
| 06dec2019 | 32 | 29 | 57 | 17 | 14 | 30 | 31 |  | 0 | 0 |
| 07dec2019 | 31 | 31 | 63 | 19 | 10 | 31 | 33 |  | 0 | 0 |
| 08dec2019 | 32 | 33 | 60 | 19 | 13 | 32 | 30 |  | 0 | 0 |
| 09dec2019 | 34 | 31 | 56 | 18 | 12 | 29 | 38 |  | 0 | 0 |
| 10dec2019 | 34 | 33 | 58 | 19 | 13 | 30 | 34 |  | 0 | 0 |
| 11dec2019 | 34 | 31 | 56 | 19 | 12 | 31 | 33 |  | 0 | 0 |
| 12dec2019 | 33 | 31 | 53 | 18 | 12 | 29 | 33 |  | 0 | 0 |
| 13dec2019 | 32 | 31 | 51 | 17 | 12 | 27 | 31 |  | 0 | 0 |
| 14dec2019 | 33 | 33 | 56 | 20 | 12 | 28 | 34 |  | 0 | 0 |
| 15dec2019 | 37 | 33 | 62 | 21 | 13 | 29 | 34 |  | 0 | 0 |

|           |    |    |    |    |    |    |    |   |   |   |
|-----------|----|----|----|----|----|----|----|---|---|---|
| 16dec2019 | 39 | 33 | 56 | 19 | 13 | 27 | 33 |   | 0 | 0 |
| 17dec2019 | 39 | 33 | 59 | 20 | 12 | 30 | 33 |   | 0 | 0 |
| 18dec2019 | 35 | 34 | 55 | 20 | 11 | 28 | 33 |   | 0 | 0 |
| 19dec2019 | 36 | 33 | 53 | 17 | 12 | 26 | 30 |   | 0 | 0 |
| 20dec2019 | 36 | 33 | 56 | 22 | 10 | 28 | 33 |   | 0 | 0 |
| 21dec2019 | 40 | 38 | 63 | 21 | 10 | 33 | 33 |   | 0 | 0 |
| 22dec2019 | 43 | 39 | 66 | 23 | 11 | 33 | 36 |   | 0 | 0 |
| 23dec2019 | 44 | 39 | 69 | 24 | 13 | 33 | 37 |   | 0 | 0 |
| 24dec2019 | 44 | 44 | 64 | 24 | 13 | 32 | 34 |   | 0 | 0 |
| 25dec2019 | 42 | 38 | 65 | 22 | 11 | 29 | 34 |   | 0 | 0 |
| 26dec2019 | 48 | 45 | 70 | 26 | 13 | 34 | 41 |   | 0 | 0 |
| 27dec2019 | 45 | 44 | 70 | 26 | 13 | 33 | 42 |   | 0 | 0 |
| 28dec2019 | 47 | 46 | 73 | 25 | 13 | 35 | 40 |   | 0 | 0 |
| 29dec2019 | 48 | 44 | 69 | 23 | 13 | 35 | 40 |   | 0 | 0 |
| 30dec2019 | 44 | 43 | 65 | 25 | 16 | 31 | 41 |   | 0 | 0 |
| 31dec2019 | 43 | 44 | 72 | 23 | 13 | 29 | 40 |   | 0 | 0 |
| 01jan2020 | 39 | 37 | 67 | 23 | 11 | 30 | 45 |   | 0 | 0 |
| 02jan2020 | 40 | 42 | 67 | 24 | 14 | 31 | 41 |   | 0 | 0 |
| 03jan2020 | 39 | 41 | 65 | 22 | 15 | 35 | 38 |   | 0 | 0 |
| 04jan2020 | 44 | 41 | 71 | 22 | 14 | 34 | 40 |   | 0 | 0 |
| 05jan2020 | 40 | 39 | 71 | 23 | 14 | 34 | 38 |   | 0 | 0 |
| 06jan2020 | 38 | 35 | 63 | 19 | 13 | 31 | 37 |   | 0 | 0 |
| 07jan2020 | 39 | 36 | 64 | 18 | 15 | 34 | 38 |   | 0 | 0 |
| 08jan2020 | 38 | 35 | 60 | 18 | 13 | 34 | 35 |   | 0 | 0 |
| 09jan2020 | 38 | 34 | 61 | 18 | 13 | 33 | 36 |   | 0 | 0 |
| 10jan2020 | 38 | 32 | 61 | 19 | 12 | 33 | 34 |   | 0 | 0 |
| 11jan2020 | 38 | 34 | 59 | 17 | 13 | 37 | 34 |   | 0 | 0 |
| 12jan2020 | 41 | 34 | 64 | 19 | 13 | 37 | 33 |   | 0 | 0 |
| 13jan2020 | 41 | 32 | 61 | 21 | 16 | 32 | 34 |   | 0 | 0 |
| 14jan2020 | 40 | 33 | 59 | 21 | 14 | 33 | 35 |   | 0 | 0 |
| 15jan2020 | 41 | 31 | 58 | 21 | 14 | 34 | 36 |   | 0 | 0 |
| 16jan2020 | 38 | 29 | 57 | 19 | 12 | 34 | 34 |   | 0 | 0 |
| 17jan2020 | 37 | 31 | 56 | 17 | 13 | 32 | 33 |   | 0 | 0 |
| 18jan2020 | 39 | 34 | 62 | 19 | 13 | 36 | 34 |   | 0 | 0 |
| 19jan2020 | 40 | 31 | 63 | 20 | 12 | 35 | 33 |   | 0 | 0 |
| 20jan2020 | 38 | 33 | 64 | 20 | 12 | 38 | 35 |   | 0 | 0 |
| 21jan2020 | 41 | 34 | 60 | 23 | 15 | 35 | 36 |   | 0 | 0 |
| 22jan2020 | 43 | 32 | 61 | 19 | 15 | 32 | 35 | 1 | 0 | 0 |
| 23jan2020 | 42 | 32 | 57 | 19 | 15 | 32 | 34 | 1 | 0 | 0 |

|           |    |    |    |    |    |    |    |    |   |    |
|-----------|----|----|----|----|----|----|----|----|---|----|
| 24jan2020 | 39 | 31 | 56 | 20 | 12 | 35 | 33 | 2  | 0 | 1  |
| 25jan2020 | 41 | 37 | 64 | 21 | 13 | 38 | 35 | 2  | 0 | 0  |
| 26jan2020 | 42 | 34 | 62 | 21 | 11 | 36 | 31 | 5  | 0 | 3  |
| 27jan2020 | 42 | 33 | 63 | 20 | 14 | 33 | 34 | 5  | 0 | 0  |
| 28jan2020 | 47 | 34 | 60 | 20 | 14 | 33 | 35 | 5  | 0 | 0  |
| 29jan2020 | 44 | 34 | 64 | 20 | 13 | 35 | 34 | 5  | 0 | 0  |
| 30jan2020 | 43 | 34 | 60 | 19 | 13 | 33 | 35 | 5  | 0 | 0  |
| 31jan2020 | 41 | 33 | 60 | 18 | 11 | 32 | 32 | 7  | 0 | 2  |
| 01feb2020 | 45 | 38 | 62 | 23 | 12 | 36 | 31 | 8  | 0 | 1  |
| 02feb2020 | 45 | 33 | 63 | 23 | 12 | 34 | 35 | 8  | 0 | 0  |
| 03feb2020 | 46 | 31 | 57 | 23 | 15 | 30 | 34 | 11 | 0 | 3  |
| 04feb2020 | 48 | 35 | 62 | 21 | 14 | 32 | 37 | 11 | 0 | 0  |
| 05feb2020 | 43 | 36 | 59 | 19 | 14 | 30 | 33 | 11 | 0 | 0  |
| 06feb2020 | 43 | 32 | 65 | 19 | 13 | 30 | 31 | 11 | 0 | 0  |
| 07feb2020 | 43 | 31 | 57 | 19 | 14 | 31 | 34 | 11 | 0 | 0  |
| 08feb2020 | 44 | 36 | 59 | 20 | 13 | 34 | 36 | 11 | 0 | 0  |
| 09feb2020 | 44 | 36 | 65 | 22 | 12 | 36 | 35 | 11 | 0 | 0  |
| 10feb2020 | 45 | 34 | 60 | 23 | 14 | 31 | 37 | 11 | 0 | 0  |
| 11feb2020 | 45 | 36 | 61 | 20 | 14 | 33 | 35 | 12 | 0 | 1  |
| 12feb2020 | 44 | 34 | 62 | 21 | 13 | 33 | 35 | 12 | 0 | 0  |
| 13feb2020 | 42 | 33 | 60 | 20 | 14 | 35 | 33 | 13 | 0 | 1  |
| 14feb2020 | 37 | 29 | 55 | 18 | 11 | 28 | 33 | 13 | 0 | 0  |
| 15feb2020 | 41 | 35 | 63 | 18 | 13 | 33 | 32 | 13 | 0 | 0  |
| 16feb2020 | 44 | 38 | 62 | 21 | 13 | 37 | 39 | 13 | 0 | 0  |
| 17feb2020 | 43 | 34 | 65 | 23 | 15 | 37 | 40 | 13 | 0 | 0  |
| 18feb2020 | 43 | 31 | 59 | 20 | 13 | 34 | 33 | 13 | 0 | 0  |
| 19feb2020 | 43 | 33 | 63 | 19 | 15 | 33 | 33 | 13 | 0 | 0  |
| 20feb2020 | 39 | 33 | 57 | 18 | 13 | 31 | 34 | 13 | 0 | 0  |
| 21feb2020 | 38 | 31 | 56 | 18 | 12 | 32 | 34 | 15 | 0 | 2  |
| 22feb2020 | 38 | 33 | 63 | 19 | 12 | 37 | 33 | 15 | 0 | 0  |
| 23feb2020 | 40 | 34 | 64 | 23 | 13 | 38 | 33 | 15 | 0 | 0  |
| 24feb2020 | 42 | 31 | 63 | 23 | 14 | 33 | 36 | 15 | 0 | 0  |
| 25feb2020 | 42 | 32 | 64 | 20 | 15 | 33 | 36 | 15 | 0 | 0  |
| 26feb2020 | 42 | 33 | 59 | 19 | 14 | 33 | 32 | 15 | 0 | 0  |
| 27feb2020 | 41 | 34 | 57 | 21 | 13 | 30 | 35 | 16 | 0 | 1  |
| 28feb2020 | 41 | 32 | 58 | 17 | 12 | 31 | 33 | 16 | 0 | 0  |
| 29feb2020 | 42 | 34 | 68 | 21 | 11 | 33 | 32 | 24 | 0 | 8  |
| 01mar2020 | 44 | 35 | 67 | 21 | 12 | 36 | 32 | 30 | 1 | 6  |
| 02mar2020 | 47 | 36 | 63 | 21 | 14 | 31 | 36 | 53 | 1 | 23 |

|           |     |    |     |    |    |    |    |        |   |       |
|-----------|-----|----|-----|----|----|----|----|--------|---|-------|
| 03mar2020 | 47  | 35 | 62  | 19 | 13 | 29 | 34 | 73     | 1 | 20    |
| 04mar2020 | 48  | 34 | 63  | 20 | 15 | 31 | 33 | 104    | 1 | 31    |
| 05mar2020 | 44  | 38 | 59  | 17 | 13 | 30 | 33 | 174    | 1 | 70    |
| 06mar2020 | 46  | 37 | 62  | 20 | 14 | 31 | 33 | 222    | 1 | 48    |
| 07mar2020 | 45  | 38 | 67  | 21 | 11 | 34 | 38 | 337    | 1 | 115   |
| 08mar2020 | 49  | 40 | 73  | 23 | 12 | 33 | 38 | 451    | 1 | 114   |
| 09mar2020 | 52  | 39 | 69  | 22 | 13 | 29 | 38 | 519    | 1 | 68    |
| 10mar2020 | 56  | 40 | 69  | 21 | 14 | 30 | 34 | 711    | 1 | 192   |
| 11mar2020 | 60  | 46 | 71  | 20 | 13 | 28 | 36 | 1109   | 1 | 398   |
| 12mar2020 | 77  | 57 | 74  | 22 | 11 | 25 | 35 | 1561   | 1 | 452   |
| 13mar2020 | 82  | 59 | 85  | 21 | 12 | 26 | 32 | 2157   | 1 | 596   |
| 14mar2020 | 90  | 68 | 89  | 23 | 11 | 30 | 39 | 2870   | 1 | 713   |
| 15mar2020 | 91  | 63 | 84  | 23 | 12 | 29 | 37 | 2968   | 1 | 98    |
| 16mar2020 | 98  | 61 | 80  | 21 | 10 | 24 | 36 | 4309   | 1 | 1341  |
| 17mar2020 | 100 | 62 | 78  | 21 | 11 | 22 | 32 | 6041   | 1 | 1732  |
| 18mar2020 | 100 | 60 | 80  | 19 | 11 | 23 | 36 | 8803   | 1 | 2762  |
| 19mar2020 | 100 | 62 | 84  | 21 | 11 | 23 | 35 | 14024  | 1 | 5221  |
| 20mar2020 | 92  | 61 | 92  | 19 | 13 | 24 | 33 | 19305  | 1 | 5281  |
| 21mar2020 | 88  | 62 | 98  | 21 | 13 | 29 | 35 | 25606  | 1 | 6301  |
| 22mar2020 | 87  | 60 | 100 | 21 | 12 | 27 | 37 | 33519  | 1 | 7913  |
| 23mar2020 | 86  | 55 | 84  | 21 | 12 | 26 | 38 | 43581  | 1 | 10062 |
| 24mar2020 | 85  | 54 | 87  | 21 | 12 | 26 | 38 | 53802  | 1 | 10221 |
| 25mar2020 | 87  | 52 | 83  | 21 | 13 | 26 | 39 | 65675  | 1 | 11873 |
| 26mar2020 | 81  | 50 | 81  | 21 | 14 | 27 | 37 | 83646  | 1 | 17971 |
| 27mar2020 | 78  | 49 | 76  | 21 | 13 | 29 | 36 | 101757 | 1 | 18111 |
| 28mar2020 | 78  | 51 | 83  | 17 | 13 | 31 | 39 | 121421 | 1 | 19664 |
| 29mar2020 | 74  | 49 | 82  | 21 | 12 | 33 | 41 | 140494 | 1 | 19073 |
| 30mar2020 | 69  | 43 | 71  | 18 | 11 | 30 | 36 | 161875 | 1 | 21381 |
| 31mar2020 | 71  | 43 | 77  | 18 | 12 | 29 | 38 | 187714 | 1 | 25839 |
| 01apr2020 | 68  | 42 | 73  | 18 | 11 | 28 | 37 | 213057 | 1 | 25343 |
| 02apr2020 | 68  | 39 | 74  | 20 | 11 | 25 | 37 | 243354 | 1 | 30297 |
| 03apr2020 | 61  | 38 | 70  | 19 | 11 | 25 | 38 | 275181 | 1 | 31827 |
| 04apr2020 | 62  | 39 | 76  | 19 | 12 | 30 | 36 | 308052 | 1 | 32871 |
| 05apr2020 | 60  | 36 | 76  | 20 | 12 | 33 | 39 | 335782 | 1 | 27730 |
| 06apr2020 | 58  | 37 | 72  | 19 | 12 | 30 | 36 | 365284 | 1 | 29502 |
| 07apr2020 | 58  | 34 | 64  | 18 | 13 | 28 | 38 | 395884 | 1 | 30600 |
| 08apr2020 | 55  | 31 | 66  | 16 | 13 | 31 | 36 | 427297 | 1 | 31413 |
| 09apr2020 | 51  | 30 | 62  | 18 | 11 | 28 | 33 | 461900 | 1 | 34603 |
| 10apr2020 | 48  | 29 | 62  | 15 | 12 | 32 | 33 | 495215 | 1 | 33315 |

|           |    |    |    |    |    |    |    |         |   |       |
|-----------|----|----|----|----|----|----|----|---------|---|-------|
| 11apr2020 | 47 | 30 | 68 | 20 | 13 | 35 | 36 | 525045  | 1 | 29830 |
| 12apr2020 | 47 | 25 | 73 | 19 | 12 | 35 | 32 | 553398  | 1 | 28353 |
| 13apr2020 | 43 | 24 | 64 | 18 | 14 | 31 | 34 | 578605  | 1 | 25207 |
| 14apr2020 | 44 | 23 | 60 | 18 | 14 | 31 | 33 | 605517  | 1 | 26912 |
| 15apr2020 | 41 | 22 | 54 | 15 | 12 | 29 | 30 | 634452  | 1 | 28935 |
| 16apr2020 | 41 | 23 | 56 | 17 | 13 | 30 | 32 | 665528  | 1 | 31076 |
| 17apr2020 | 38 | 22 | 51 | 17 | 11 | 29 | 30 | 698100  | 1 | 32572 |
| 18apr2020 | 39 | 21 | 61 | 16 | 11 | 33 | 36 | 726178  | 1 | 28078 |
| 19apr2020 | 39 | 22 | 61 | 18 | 13 | 33 | 36 | 752014  | 1 | 25836 |
| 20apr2020 | 39 | 20 | 56 | 16 | 12 | 33 | 34 | 779182  | 1 | 27168 |
| 21apr2020 | 38 | 20 | 57 | 17 | 11 | 32 | 34 | 804462  | 1 | 25280 |
| 22apr2020 | 39 | 19 | 54 | 16 | 11 | 31 | 31 | 832600  | 1 | 28138 |
| 23apr2020 | 38 | 19 | 56 | 16 | 12 | 31 | 32 | 866481  | 1 | 33881 |
| 24apr2020 | 36 | 19 | 51 | 16 | 12 | 31 | 29 | 902743  | 1 | 36262 |
| 25apr2020 | 39 | 20 | 57 | 17 | 12 | 33 | 34 | 935461  | 1 | 32718 |
| 26apr2020 | 34 | 18 | 59 | 18 | 11 | 35 | 34 | 962941  | 1 | 27480 |
| 27apr2020 | 35 | 18 | 56 | 17 | 12 | 31 | 33 | 985348  | 1 | 22407 |
| 28apr2020 | 35 | 18 | 53 | 15 | 13 | 30 | 33 | 1009760 | 1 | 24412 |
| 29apr2020 | 35 | 17 | 57 | 15 | 11 | 31 | 33 | 1037023 | 1 | 27263 |
| 30apr2020 | 33 | 18 | 53 | 15 | 13 | 32 | 32 | 1066428 | 1 | 29405 |
| 01may2020 | 31 | 16 | 52 | 14 | 13 | 28 | 30 | 1100219 | 1 | 33791 |
| 02may2020 | 31 | 17 | 56 | 15 | 11 | 34 | 32 | 1129093 | 1 | 28874 |
| 03may2020 | 34 | 16 | 62 | 18 | 10 | 36 | 37 | 1154410 | 1 | 25317 |
| 04may2020 | 32 | 15 | 54 | 17 | 11 | 31 | 31 | 1176696 | 1 | 22286 |
| 05may2020 | 30 | 16 | 58 | 16 | 11 | 31 | 31 | 1200648 | 1 | 23952 |
| 06may2020 | 29 | 16 | 55 | 15 | 13 | 30 | 32 | 1225716 | 1 | 25068 |
| 07may2020 | 31 | 17 | 53 | 15 | 12 | 29 | 31 | 1253342 | 1 | 27626 |
| 08may2020 | 30 | 15 | 55 | 14 | 11 | 30 | 30 | 1280125 | 1 | 26783 |
| 09may2020 | 29 | 16 | 56 | 15 | 10 | 33 | 32 | 1305644 | 1 | 25519 |
| 10may2020 | 30 | 16 | 54 | 16 | 12 | 36 | 32 | 1325226 | 1 | 19582 |
| 11may2020 | 33 | 15 | 57 | 18 | 13 | 34 | 36 | 1343926 | 1 | 18700 |
| 12may2020 | 30 | 16 | 54 | 18 | 12 | 30 | 32 | 1365738 | 1 | 21812 |
| 13may2020 | 32 | 15 | 54 | 15 | 14 | 33 | 32 | 1386804 | 1 | 21066 |
| 14may2020 | 31 | 15 | 52 | 15 | 12 | 33 | 34 | 1414171 | 1 | 27367 |
| 15may2020 | 32 | 13 | 52 | 15 | 11 | 28 | 28 | 1439219 | 1 | 25048 |
| 16may2020 | 31 | 15 | 57 | 16 | 13 | 33 | 34 | 1464100 | 1 | 24881 |
| 17may2020 | 30 | 15 | 62 | 16 | 13 | 36 | 33 | 1482966 | 1 | 18866 |
| 18may2020 | 30 | 13 | 58 | 16 | 13 | 31 | 33 | 1504463 | 1 | 21497 |
| 19may2020 | 31 | 14 | 56 | 16 | 12 | 34 | 35 | 1524702 | 1 | 20239 |

|                  |    |    |    |    |    |    |    |         |   |       |
|------------------|----|----|----|----|----|----|----|---------|---|-------|
| <b>20may2020</b> | 30 | 14 | 55 | 15 | 13 | 30 | 33 | 1548136 | 1 | 23434 |
| <b>21may2020</b> | 29 | 16 | 55 | 14 | 12 | 29 | 32 | 1573377 | 1 | 25241 |
| <b>22may2020</b> | 29 | 14 | 55 | 15 | 12 | 31 | 32 | 1597292 | 1 | 23915 |
| <b>23may2020</b> | 28 | 15 | 56 | 17 | 11 | 34 | 35 | 1618976 | 1 | 21684 |
| <b>24may2020</b> | 29 | 13 | 62 | 15 | 12 | 37 | 36 | 1639531 | 1 | 20555 |
| <b>25may2020</b> | 29 | 13 | 60 | 18 | 13 | 33 | 37 | 1658315 | 1 | 18784 |
| <b>26may2020</b> | 28 | 14 | 59 | 15 | 14 | 31 | 30 | 1676989 | 1 | 18674 |
| <b>27may2020</b> | 29 | 13 | 56 | 18 | 13 | 32 | 33 | 1695207 | 1 | 18218 |
| <b>28may2020</b> | 29 | 13 | 59 | 15 | 12 | 30 | 34 | 1717867 | 1 | 22660 |
| <b>29may2020</b> | 28 | 13 | 56 | 15 | 12 | 30 | 30 | 1742147 | 1 | 24280 |
| <b>30may2020</b> | 26 | 12 | 59 | 15 | 10 | 31 | 34 | 1766143 | 1 | 23996 |
| <b>31may2020</b> | 26 | 13 | 60 | 16 | 13 | 35 | 31 | 1786130 | 1 | 19987 |
| <b>01jun2020</b> | 26 | 12 | 56 | 16 | 12 | 29 | 31 | 1803327 | 1 | 17197 |
| <b>02jun2020</b> | 26 | 11 | 58 | 13 | 12 | 28 | 32 | 1824126 | 1 | 20799 |
| <b>03jun2020</b> | 27 | 11 | 51 | 15 | 11 | 28 | 31 | 1843786 | 1 | 19660 |
| <b>04jun2020</b> | 26 | 11 | 55 | 15 | 12 | 31 | 30 | 1864487 | 1 | 20701 |
| <b>05jun2020</b> | 26 | 12 | 56 | 14 | 12 | 32 | 33 | 1889607 | 1 | 25120 |
| <b>06jun2020</b> | 28 | 12 | 63 | 16 | 12 | 32 | 31 | 1911926 | 1 | 22319 |
| <b>07jun2020</b> | 29 | 14 | 64 | 15 | 12 | 35 | 34 | 1929563 | 1 | 17637 |
| <b>08jun2020</b> | 29 | 12 | 58 | 17 | 12 | 30 | 31 | 1946916 | 1 | 17353 |
| <b>09jun2020</b> | 28 | 12 | 60 | 17 | 12 | 32 | 36 | 1964776 | 1 | 17860 |
| <b>10jun2020</b> | 31 | 11 | 62 | 14 | 14 | 32 | 31 | 1985402 | 1 | 20626 |
| <b>11jun2020</b> | 27 | 12 | 59 | 17 | 13 | 32 | 33 | 2008212 | 1 | 22810 |
| <b>12jun2020</b> | 28 | 12 | 58 | 16 | 11 | 30 | 32 | 2033359 | 1 | 25147 |
| <b>13jun2020</b> | 28 | 13 | 61 | 16 | 11 | 31 | 35 | 2058690 | 1 | 25331 |
| <b>14jun2020</b> | 27 | 13 | 66 | 19 | 12 | 35 | 36 | 2078302 | 1 | 19612 |
| <b>15jun2020</b> | 29 | 13 | 62 | 17 | 13 | 32 | 37 | 2097898 | 1 | 19596 |
| <b>16jun2020</b> |    |    |    |    |    |    |    | 2121522 | 1 | 23624 |
| <b>17jun2020</b> |    |    |    |    |    |    |    | 2146997 | 1 | 25475 |
| <b>18jun2020</b> |    |    |    |    |    |    |    | 2174591 | 1 | 27594 |
| <b>19jun2020</b> |    |    |    |    |    |    |    | 2205977 | 1 | 31386 |
| <b>20jun2020</b> |    |    |    |    |    |    |    | 2238373 | 1 | 32396 |
| <b>21jun2020</b> |    |    |    |    |    |    |    | 2264630 | 1 | 26257 |
| <b>22jun2020</b> |    |    |    |    |    |    |    | 2295200 | 1 | 30570 |
| <b>23jun2020</b> |    |    |    |    |    |    |    | 2330229 | 1 | 35029 |
| <b>24jun2020</b> |    |    |    |    |    |    |    | 2364895 | 1 | 34666 |
| <b>25jun2020</b> |    |    |    |    |    |    |    | 2404770 | 1 | 39875 |
| <b>26jun2020</b> |    |    |    |    |    |    |    | 2449937 | 1 | 45167 |
| <b>27jun2020</b> |    |    |    |    |    |    |    | 2492359 | 1 | 42422 |

|           |  |  |  |  |  |  |  |         |   |       |
|-----------|--|--|--|--|--|--|--|---------|---|-------|
| 28jun2020 |  |  |  |  |  |  |  | 2531049 | 1 | 38690 |
| 29jun2020 |  |  |  |  |  |  |  | 2572494 | 1 | 41445 |
